# Supplementary material for: Super-resolving microscopy reveals the localizations and movement dynamics of stressosome proteins in Listeria monocytogenes
Source: PubMed Central journal article supplement (PMC9840623; doi:10.1038/s42003-023-04423-y), 2023-01-14
Supplement: 42003_2023_4423_MOESM1_ESM.pdf [file 42003_2023_4423_MOESM1_ESM.pdf]

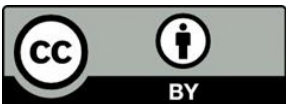

**Open Access** This file is licensed under a Creative Commons Attribution 4.0 International License, which permits use, sharing, adaptation, distribution and reproduction in any medium or format, as long as you give appropriate credit to the original author(s) and the source, provide a link to the Creative Commons license, and indicate if changes were made. In the cases where the authors are anonymous, such as is the case for the reports of anonymous peer reviewers, author attribution should be to 'Anonymous Referee' followed by a clear attribution to the source work. The images or other third party material in this file are included in the article's Creative Commons license, unless indicated otherwise in a credit line to the material. If material is not included in the article's Creative Commons license and your intended use is not permitted by statutory regulation or exceeds the permitted use, you will need to obtain permission directly from the copyright holder. To view a copy of this license, visit <http://creativecommons.org/licenses/by/4.0/>.

1 **Response to reviewers**

2

3 **Reviewer #1 (Remarks to the Author):**

4 The authors measured the diffusion of several proteins related to the stressosomes in  
5 *Listeria monocytogenes*. Although the techniques employed are modern and  
6 experiments are carefully done, the results do not form a cogent story that provides  
7 new insights into the structure or function of stressosomes. Thus, this work may not  
8 be suitable for Nature Communications.

9 Specifically, the authors used a fluorescent protein, mEos3.2, to label the different  
10 proteins and measured diffusion. How are their diffusion measurements, which seem  
11 to be based on the discussion of individual proteins, relate to the “RsbR-RsbS 60-  
12 protomers truncated icosahedron” structure of the stressosome? Their PALM images  
13 of mEos3.2::rsbR1 did not appear to be integrated into clusters that can be identified  
14 as stressosomes.

15 >>> Reply: We thank the reviewer for the appreciation of our work, in particular the  
16 technical aspects of the advanced microscopy and data analysis. We disagree with  
17 the reviewer that we do not present a compelling story. We acknowledge that some  
18 results are surprising and differ from the current thinking, e.g. the membrane-bound  
19 state of RsbR1 is not required for sensing, and RsbL forms clusters upon  
20 illumination. We feel that this emphasises the importance of our measurements,  
21 which are complementary to classical molecular biology and microbiology  
22 approaches used in the past.

23 We studied the dynamics of stressosome proteins in live cells, and we infer from the  
24 diffusion data whether the proteins form higher-order assemblies such as  
25 stressosomes or bind to the membrane. We see no other direct way of measuring  
26 the dynamics of stressosome complexes; one always has to tag one of the subunits.  
27 The RsbR-RsbS 60-protomer truncated icosahedron structure is composed of  
28 multiple subunits from the structural study<sup>1</sup> that can also be present in the cell as  
29 individual proteins or subcomplexes. It is the diversity of (sub-)structures that we  
30 have probed with advanced light microscopy techniques.

31 Indeed, it is surprising that, unlike mEos3.2-RsbL clustered upon illumination,  
32 mEos3.2-RsbR1 did not always integrate into one defined cluster size,

33 corresponding to the full stressosome complex, but that sub-complexes can be found  
34 as well (Supplementary Video 1 and Supplementary Video 2). We have modified the  
35 text to explain the approach and observations better.

36 Additional issues with the major conclusions:

37 1. A local heterogeneity of diffusion in the cytoplasm of *L. monocytogenes* with free  
38 mEos3.2 proteins in the middle of the cell diffusing faster than in the pole regions.  
39 This is not related to the stressosome topic of this work.

40 >>> Reply: We agree on the point of local heterogeneity, and we have no longer  
41 accentuated the differences in the mobility of mEos3.2 in the pole regions and  
42 middle of the cell as one of the main findings. However, the measurements on free  
43 mEos3.2 are essential. It is a benchmark for the fusion constructs and comparing the  
44 protein diffusions in the cytoplasm and at the membrane.

45 2. the small hydrophobic protein Prli42 is essential for membrane localization of  
46 RsbR1 but does not influence stress sensing.

47 The results are not very convincing. For example, the D values were  $0.2 \pm 0.04 \mu\text{m}^2/\text{s}$   
48 for the wild type and  $0.29 \pm 0.11 \mu\text{m}^2/\text{s}$  for the removal of prli42. Also, the pH=5  
49 results of  $0.14 \pm 0.02 \mu\text{m}^2/\text{s}$  and  $0.15 \pm 0.03 \mu\text{m}^2/\text{s}$  were essentially the same between  
50 the wildtype and prli42 removal. They also showed PALM images of RsbR1, but  
51 even in the examples given, the differences in membrane localization are not very  
52 clear between the wildtype and prli42 removal.

53 >>> Reply: We fully understand the concern of the reviewer. The differences in  
54 diffusion coefficients are minor, yet they are significant - based on the confidence  
55 level of the statistical test ( $P < 0.001$ ). Notably, the SMdM and SPT data are internally  
56 consistent (Fig. 3f and Fig. 4g). The analysis of the protein diffusion that can be  
57 present in multiple states is complicated<sup>2</sup>, and that is why we used different  
58 microscopy techniques (SMdM, SPT, FRAP and PALM) to substantiate our findings.  
59 We have modified the manuscript (Lines 227 – 234 and 255 - 256) by emphasizing  
60 the key findings, the significance of the data, and the intricacies of obtaining diffusion  
61 coefficients of proteins that can be present in different aggregation states.  
62 Additionally, Supplementary Videos 1 and 2 are added to show the localization and  
63 clustering of RsbR1.

64 3. The cytoplasmic fraction of RsbR1 is present in supramolecular complexes,  
65 presumably with RsbS (and probably RsbT) to form the stressosome;

66 These seem not directly supported by their diffusion data.

67 >>> Reply: We postulate the states of RsbR1 on the basis of its much slower  
68 diffusion than expected for a free cytosolic protein with  $M_w = 57.8$  kDa (mEos3.2-  
69 RsbR1). We emphasise that the mEos3.2-RsbR1 fusion is in-frame with RsbS and  
70 RsbT both on the chromosome and plasmid. Hence, RsbR1 is likely present in the  
71 form of protomers of RsbR1-RsbS (but not in a full stressosome complex), which  
72 explains the slow diffusion. We have changed and assigned this state as the  
73 Intermediate state (Int), while monomeric mEos3.2-RsbR1 is the free state. We  
74 rephrased the text to clarify our interpretation of the data (Lines 280 - 290, 304 -  
75 309, 451 – 454, and 468 – 470).

76 4. The slowing of diffusion of the blue light receptor RsbL upon illumination suggests  
77 that the association of the protein with the stressosome is blue-light dependent, a  
78 process that is independent of Prli42.

79 They used 405 and 560 nm. Which of the two illuminations played the role? Neither  
80 is “blue light”. Also, they should compare with another target like RsbR1 as a  
81 negative control to show no similar slowing of diffusion after illumination.

82 >>> Reply: The name blue-light receptor is given for RsbL (Lmo0799) in *L.*  
83 *monocytogenes* (and its homolog YtvA in *B. subtilis*) as it possesses a light, oxygen,  
84 voltage (LOV) domain that is homologous to the photoactive, flavin mononucleotide  
85 (FMN)-binding LOV domains of phototropin found in higher plants<sup>3</sup>. The  
86 photochemistry of RsbL shows an absorption spectrum in the ground state (dark  
87 state) with maxima near 375, 450, and 475 nm<sup>3,4</sup>. We used the laser lines of our  
88 microscopes to excite RsbL, which indeed does not correspond to the absorption  
89 maxima but suffice for photoconversion between the different states. We thus  
90 conclude that the clustering of RsbL, elicited by 405 nm illumination, is  
91 physiologically relevant.

92 As for the controls - we show in the manuscript (Lines 317 - 319 and 497 - 517) that  
93 the clustering upon laser illumination does not occur with free mEos3.2, mEos3.2-  
94 Prli42, and mEos3.2-RsbR1 (Supplementary Videos 1, 2, versus 3). Hence, the  
95 clustering of mEos3.2-RsbL is a genuine property of the light sensor RsbL.

96

97 **Reviewer #2 (Remarks to the Author):**

98 The authors of “The dynamics and function of stressosome proteins in *Listeria*  
99 *monocytogenes*” present thorough subcellular analysis of the location and diffusion  
100 of stressosome protein RsbR1 using a fluorescently tagged version. The techniques  
101 used allow for detailed and sensitive measurements that have not been shown before  
102 for the stressosome. Given the ubiquity of the stressosome in bacterial species and  
103 its “stress sensing hub” role, questions about the cellular and subcellular behavior of  
104 proteins in this complex are important ones to address. Overall the data of the  
105 mEose3.2::RsbR1 construct provide interesting observations about the subcellular  
106 localization and dynamics of RsbR1 (Fig3e, Fig3f, Fig4b, Fig4c) and the role that the  
107 membrane bound protein Prli42 plays in the diffusion of RsbR1. The results are  
108 consistent with those found previously in that RsbR1 interacts with Prli42 and the  
109 membrane association of RsbR1 is dependent on Prli42. Unfortunately, this reviewer  
110 found the data on RsbL less convincing and has suggestions on how to address it.  
111 Overall, the RsbR1 dynamic characterization will be useful for further testing a  
112 variety of SigB inducing conditions to understand stressosome dynamics.

113 >>> Reply: We thank the reviewer for his/her favourable evaluation of the paper and  
114 valid suggestions.

115 Recommendations.

116 1. Move the construct strain characterization text to the beginning of the results  
117 section. Lines 402-423. It is important to establish early on that the mEos3.2 fusions  
118 are functional so that the localization data are interpretable. The authors show that  
119 the chromosomal integrated RsbR1 construct phenocopies the WT in Supplementary  
120 figure 12. But the data on the RsbL construct are less favourable showing the  
121 construct is non-functional in its light sensing function, Supplementary Figure 13.  
122 Given that the characterization of the RsbL fusion is done using light irradiation, and  
123 cells containing the construct did not complement a null in a light sensing assay, the  
124 data on RsbL localization and clustering are less than convincing. This reviewer  
125 would recommend, removing the RsbL data all together or at the very least noting  
126 that the data are inconclusive and deemphasizing them. See #2 for more details on  
127 specific text language.

128 >>> Reply: We agree, and we have moved the phenotypic screening to the  
129 beginning of the results section. We also agree to de-emphasize the data of RsbL  
130 association with stressosome complexes. The appropriate changes have been made  
131 at lines 86 – 88, 432 – 434, and 510 - 517.

132 2. This reviewer suggests that the authors remove language from the manuscript  
133 that alludes to conclusions not shown by the data presented regarding RsbL  
134 clustering. For example, lines 94, 95, 544, 569, 570. In these instances, the authors  
135 state the clustering of RsbL is stressosome associated, yet no evidence is shown for  
136 that conclusion. Data showing RsbL fusion clustering in a stressosome deficient cell  
137 or other co-localization assays would give weight to those statements. Additionally,  
138 the fact that the fusion is nonfunctional for light sensing makes the clustering  
139 phenotype observed puzzling. Any affirmative conclusions about the RsbL fusion  
140 need further evidence and are not supported as they currently stand in the  
141 manuscript.

142 >>> Reply: We agree, and we have rephrased the text accordingly (Line 24 – 25, 86  
143 – 88, 432 - 434, 522 - 524). The assumption that the clustering of RsbL might be  
144 stressosome-associated is based on the change in the diffusion coefficient. We  
145 acknowledge that it is unfortunate that RsbL fusions are no longer functional in light  
146 sensing, yet the clustering is still light-dependent.

147 3. Given that the localization (membrane bound vs free) and diffusion rates of RsbR1  
148 change in the *pri42* null strain, a complementary experiment would be to make the  
149 N-terminal mutant of *pri42* known to prevent *Pri42* interaction with RsbR1 and  
150 measure RsbR1 construct dynamics. This could refine the molecular model of  
151 interactions between the two proteins or if found differently propose new hypotheses.

152 >>> Reply: The suggested experiment is important to understand the interaction  
153 between *Pri42* and RsbR1 and has been done by immunoprecipitation and  
154 immunoblotting in a previous study<sup>5</sup>. However, we found that the growth rates and  
155 acidic stress responses of the wild-type and *pri42* null strain are identical in the  
156 phenotypic screenings (See Phenotypic screening of the integrative strain,  
157 Supplementary Fig. 11, and Supplementary Fig. 12). Hence, *Pri42* is important for  
158 tethering the stressosome to the membrane but does not play essential roles in  
159 sensing stress. The precise mode of action of *Pri42* remains to be uncovered. *Pri42*

160 has been hypothesized that it could bring the stressosome into contact with a  
161 membrane protein, but that protein is as-yet-unidentified<sup>5,6</sup>. Therefore, the work on  
162 the complementary experiment is beyond the scope of our study.

163 4. One important question about stressosome structure is whether in vivo  
164 stressosomes are heterogenous complexes and whether the stoichiometry of the  
165 different RsbR paralogs changes during stress sensing and signaling. It seems that  
166 the RsbR1 fusion characterization was done in a wild type strain (unless I missed it)  
167 carrying the other RsbR paralogs, and therefore the RsbR1 localization involved a  
168 stressosome containing other RsbR members. Dessaux et al showed in 2020 that  
169 RsbR1 interactions are affected by the presence of its paralogs, what would happen  
170 to RsbR1 dynamics when it is the only the sensor in the stressosome? This  
171 experiment would add mechanistic insight to the phenomena observed by the  
172 authors and strengthen the impact the results have.

173 >>> Reply: We appreciate the suggestion of the reviewer, but we also feel that it is  
174 beyond the scope of this study.

175

### 176 **Reviewer #3 (Remarks to the Author):**

177 This manuscript by Tran et al. is both interesting and important, as it is at a key  
178 frontier for studies of signal sensation and transduction by bacterial stressosomes—  
179 namely, to visualize in vivo the molecular-level events that accompany stress  
180 sensation and signaling. This report takes a step towards the goal of understanding  
181 the dynamics of constituent proteins at the individual stressosome level to initiate the  
182 SigB-mediated stress response. In this work, the authors use single-particle tracking  
183 and other super-resolution fluorescence microscopic techniques to probe the  
184 localization and motion of two stressosome-associated sensors (RsbR1 and the light  
185 sensor RsbL) and one membrane-bound accessory factor (Prli42) that putatively  
186 tethers stressosome-associated factors to the cell membrane. The experiments are  
187 well done, and I am enthusiastic about the data.

188 Perhaps my biggest difficulty with this manuscript was that it does not follow a logical  
189 progression, making it very difficult to understand. What is the central question of the  
190 paper? There are many disparate results: from diffusion in different cell zones to  
191 localization of different proteins, many different diffusion numbers, plasmid-borne



192 and integrated genes, but what is the overall message? I understand that some of  
193 the findings are disparate, but for the sake of the reader the text needs to lead the  
194 reader logically from question to experiment to answer.

195 In my reading, the most important and exciting findings of the study are 1)  
196 confirmation that RsbR1 membrane-proximal location largely depends on Prli42; 2)  
197 that mEos-RsbR1 shows two different diffusion coefficients, suggestive of different  
198 association states; and 3) that mEos-RsbL diffuses faster than RsbR1 but clusters as  
199 cells are irradiated with light, slowing RsbL diffusion to values similar to that of  
200 RsbR1.

201 >>> Reply: We thank the reviewer for his/her favourable evaluation of the paper and  
202 valid suggestions. A number of his/her comments have been addressed in the  
203 rebuttal to R1 and R2.

204 Main concerns

205 1. It was unclear how some of the categories used in the paper were derived. Are the  
206 “membrane-bound” and “clustered” fractions of the fluorescent proteins defined by  
207 their diffusion coefficients or by their cellular localization? What were the criteria for  
208 placing a particular particle into each category?

209 >>> Reply: Very good point, thank you. We added a paragraph to explain the  
210 categories (Lines 280 - 290). SMdM and SPT provide both localization and mobility  
211 data. We categorised the protein states on the basis of individual trajectories of  
212 particles and the obtained diffusion coefficients; the latter gives an estimate of the  
213 size. However, it is practically impossible to determine the exact number of diffusive  
214 states on the basis of the tracking data<sup>2</sup>. Hence, we first used the localization data  
215 (membrane or cytoplasm; different conditions) and then the tracking (SPT) and  
216 SMdM data to estimate the diffusion coefficients, from which we infer whether or not  
217 the proteins cluster.

218 2. Because of its potential interaction with stressosomes, mEos-Prli42 diffusion is  
219 likely not representative of a generic membrane protein, and its diffusion is on the  
220 same order as the “mBd” and “Cl” fractions of R1 and L, consistent with an  
221 interaction. To test how Prli42-stressosome interactions impact the diffusion of each,  
222 a useful control would be a mutant of mEos-Prli42 that does not interact with RsbR1  
223 (e.g., the R8A mutation; Impens et al. 2017).



224 >>> Reply: Membrane diffusion is largely determined by the viscosity of the  
225 membrane (see also Table 1 in Doeven et al. 2005)<sup>7</sup>, and the diffusion coefficient of  
226 membrane-bound proteins has a different dependence on size than of water-soluble  
227 proteins (see Ramadurai et al (2009) JACS 131: 12650)<sup>8</sup>. The hydrophobicity  
228 properties of Prli42 make it a genuine membrane protein, and the diffusion  
229 coefficient of mEos3.2-Prli42 is in accordance with observations made for other  
230 membrane proteins<sup>9-14</sup>. Therefore, we feel that making the R8A mutation would not  
231 yield much additional information. (See comment 3 of Reviewer 2)

232 3. The finding that mEos-RsbR1 has two distinct diffusion coefficients that are  
233 several-fold different is quite intriguing, because it suggests two different association  
234 states. But the faster-diffusing population is still much slower (0.15-0.29  $\mu\text{m}^2/\text{s}$ ) than  
235 free mEos and is not greatly impacted by the presence of Prli42, suggesting that  
236 neither association state is free—are we seeing single stressosomes and then  
237 stressosome clusters? How do the authors interpret this central finding of the study?

238 >>> Reply: We speculated that RsbR1 in the free (Fr) state is in the form of  
239 protomers of RsbR1-RsbS with  $D = 0.46 - 0.75 \mu\text{m}^2/\text{s}$ , whereas Rsb1 as part of the  
240 full stressosome complex (RsbR1-RsbS-RsbT) has  $D = 0.01 - 0.03 \mu\text{m}^2/\text{s}$ . We thank  
241 the reviewer for pointing out that the “free state” is confusing in the context of  
242 mEos3.2-RsbR1. We now refer to the component with  $D = 0.46 - 0.75 \mu\text{m}^2/\text{s}$  as the  
243 Intermediate state (Int), whereas monomeric mEos3.2-RsbR1 is the free state. We  
244 have modified the text and figures accordingly.

245 We emphasise that when mEos3.2-RsbR1 is highly expressed from a plasmid  
246 (without in-frame fusion to the genes for RsbS and RsbT) the molecules end up in  
247 large immobile aggregates. This is the reason why subsequently we made  
248 chromosomal integration of *mEos3.2::rsbR1* in-frame with *rsbS* and *rsbT*. For  
249 mEos3.2-RsbR1 molecules at membrane-proximal locations (mBd fraction), we  
250 observe  $D = 0.12 - 0.29 \mu\text{m}^2/\text{s}$ , which is similar to the diffusion of Prli42 and  
251 suggests a fraction of monomeric mEos3.2-RsbR1 bound to Prli42 or unknown  
252 membrane components. We provide additional Supplementary Videos 1 and 2 to  
253 show the localization and clustering of RsbR1.

254 4. I am sympathetic to the intriguing idea that RsbL clustering might represent light-  
255 dependent association of L with stressosomes. But two difficulties with this

256 interpretation are 1) that the “Cl” fraction of RsbL diffuses faster than the “Cl” fraction  
257 of RsbR1 and 2) that R1 clustering is much rarer in the reconstructed images than L  
258 clustering after irradiation. If the clustering of L is into stressosomes, why don’t we  
259 see the same clustered pattern for R1? As this is another main finding of the paper, it  
260 deserves careful interpretation. It is certainly possible that the clustering is  
261 independent of stressosomes and is just a newly discovered property of RsbL after  
262 light exposure—perhaps even a mechanism by which the light response is turned  
263 off?

264 >>> Reply: The reviewer has partly given the answer him/herself. We added a  
265 paragraph (Lines 510 – 517) to discuss the clustering effect of RsbL. Indeed, RsbL  
266 forms clusters upon illumination, which is completely novel to the current knowledge.  
267 Unfortunately, we cannot conclude whether RsbL is associated with stressosome  
268 with the diffusion and localization data. However, since RsbL is one of the RsbR  
269 paralogs, it is likely that RsbL forms protomers with RsbS in a similar way to RsbR1-  
270 RsbS and form stressosome complexes. Therefore, there are two mutually exclusive  
271 hypotheses for the clustering of RsbL upon illumination: (1) RsbL is associated with  
272 stressosome complexes or (2) the clustering upon illumination could be independent  
273 of stressosomes - a newly discovered property for RsbL.

274 Minor points

275 1. The title is vague—it sounds like a review. It should instead reflect the central  
276 message of the paper (that’s up to the authors but should be specific). Two  
277 examples: “RsbR1 of *Listeria monocytogenes* displays two diffusion states and is  
278 membrane-localized by Prli42” or “Stressosome sensor proteins in *Listeria*  
279 *monocytogenes* display clustering and membrane localization”. Or even  
280 “Stressosome sensor proteins in *Listeria monocytogenes* show multiple diffusion  
281 states in vivo”.

282 >>> Reply: We have changed the title to “Super-resolving microscopy reveals the  
283 localizations and movement dynamics of stressosome proteins in  
284 *Listeria monocytogenes*”.

285

286 2. The abstract and text sometimes make claims that are not strictly supported by  
287 the data, e.g., l. 25-26 and 94-95. Association of RsbL with the stressosome complex

288 upon exposure to light is not shown here. The diffusion rates of clustered L are  
289 perhaps consistent with stressosome interaction, but there are other possible  
290 interpretations. Another small example is I. 422-423, that tagging of RsbL hampers  
291 its light sensing. It seems clear that it hampers signaling to sigB, but the light-  
292 dependent clustering result suggests that it can still indeed respond to (and thus  
293 sense) light.

294 >>> Reply: We rephrased the text to make the points clearer.

295 3. Proper genetic nomenclature should be followed in the text and strain table (“:”  
296 means an insertion).

297 >>> Reply: This is a valid point. We corrected the genetic nomenclatures in the text,  
298 images, and tables.

## 299 References

- 300 1. Williams, A. H. *et al.* The cryo-electron microscopy supramolecular structure of  
301 the bacterial stressosome unveils its mechanism of activation. *Nat. Commun.*  
302 **10**, (2019).
- 303 2. Persson, F., Lindén, M., Unoson, C. & Elf, J. Extracting intracellular diffusive  
304 states and transition rates from single-molecule tracking data. *Nat. Methods*  
305 **10**, 265–269 (2013).
- 306 3. Losi, A., Polverini, E., Quest, B. & Gärtner, W. First evidence for phototropin-  
307 related blue-light receptors in prokaryotes. *Biophys. J.* **82**, 2627–2634 (2002).
- 308 4. Chan, R. H., Lewis, J. W. & Bogomolni, R. A. Photocycle of the LOV-STAS  
309 protein from the pathogen *Listeria monocytogenes*. *Photochem. Photobiol.* **89**,  
310 361–369 (2013).
- 311 5. Impens, F. *et al.* N-terminomics identifies Prli42 as a membrane miniprotein  
312 conserved in Firmicutes and critical for stressosome activation in *Listeria*  
313 *monocytogenes*. *Nat. Microbiol.* **2**, (2017).
- 314 6. Radoshevich, L. & Cossart, P. *Listeria monocytogenes*: towards a complete  
315 picture of its physiology and pathogenesis. *Nat. Rev. Microbiol.* **16**, 32–46  
316 (2018).
- 317 7. Doeven, M. K. *et al.* Distribution, lateral mobility and function of membrane

- 318 proteins incorporated into giant unilamellar vesicles. *Biophys. J.* **88**, 1134–  
319 1142 (2005).
- 320 8. Ramadurai, S. *et al.* Lateral diffusion of membrane proteins. *J. Am. Chem.*  
321 *Soc.* **131**, 12650–12656 (2009).
- 322 9. Oswald, F., Varadarajan, A., Lill, H., Peterman, E. J. G. & Bollen, Y. J. M.  
323 MreB-dependent organization of the E. coli cytoplasmic membrane controls  
324 membrane protein diffusion. *Biophys. J.* **110**, 1139–1149 (2016).
- 325 10. Kumar, M., Mommer, M. S. & Sourjik, V. Mobility of cytoplasmic, membrane,  
326 and DNA-binding proteins in Escherichia coli. *Biophys. J.* **98**, 552–559 (2010).
- 327 11. Mullineaux, C. W., Nenninger, A., Ray, N. & Robinson, C. Diffusion of green  
328 fluorescent protein in three cell environments in Escherichia coli. *J. Bacteriol.*  
329 **188**, 3442–3448 (2006).
- 330 12. Seinen, A. B., Spakman, D., van Oijen, A. M. & Driessen, A. J. M. Cellular  
331 dynamics of the SecA ATPase at the single molecule level. *Sci. Rep.* **11**, 1–16  
332 (2021).
- 333 13. Van Den Berg, J., Galbiati, H., Rasmussen, A., Miller, S. & Poolman, B. On the  
334 mobility, membrane location and functionality of mechanosensitive channels in  
335 Escherichia coli. *Sci. Rep.* **6**, 1–11 (2016).
- 336 14. Mika, J. T., Schavemaker, P. E., Krasnikov, V. & Poolman, B. Impact of  
337 osmotic stress on protein diffusion in Lactococcus lactis. *Mol. Microbiol.* **94**,  
338 857–870 (2014).
- 339

## REVIEWERS' COMMENTS:

### Reviewer #1 (Remarks to the Author):

The authors have addressed my questions and the manuscript was improved. I recommend publication.

### Reviewer #2 (Remarks to the Author):

In this revised manuscript by Tran et al., the authors have done a good job addressing many of the reviewer comments. The data that this paper contributes to the field are valuable, despite the fact that not all of the observed phenomena are yet fully explained or connected to other work on the stressosome. In the revision, the interpretations match the data rather than drawing inferences that are not formally supported by the results. The authors should be applauded for undertaking this study, which represents a very substantial amount of careful microscopic analysis, not to mention the genetic work. It will be interesting to gain in future studies a more complete cell biological picture of stressosome dynamics within cells. In my opinion, the paper is essentially publication ready. I have only a few minor textual recommendations.

#### Minor points

ll. 292, 440: Agreed that RsbR1 has three distinguishable diffusive states, but whether each diffusive state represents a biologically relevant (i.e., functionally distinct), state formally remains unknown, as there are no functional tests for each state nor phenotypic differences that are conditioned on a particular diffusive state. Thus I advocate that these statements be qualified (“...diffusive states that may correspond to biologically relevant differences...”, for example).

ll. 495-6, 506, 516-517, 524. In the interpretations regarding the interesting light-stimulated clustering of mEos3.2-rsbl, caution should be used to avoid drawing conclusions about the native function of RsbL (e.g., that light-sensing is a 2-step process that includes clustering). The data indicate only that mEos3.2-RsbL, which is nonfunctional based on the ring-formation phenotype, clusters. Hence it remains unknown whether clustering is a property of unlabeled RsbL and whether, if it occurs, whether it has a biological function or is incidental.
