# Supplementary material for: Super-resolving microscopy reveals the localizations and movement dynamics of stressosome proteins in Listeria monocytogenes
Source: PubMed Central journal article supplement (PMC9840623; doi:10.1038/s42003-023-04423-y), 2023-01-14
Supplement: 42003_2023_4423_MOESM2_ESM.pdf [file 42003_2023_4423_MOESM2_ESM.pdf]

2  
3 **Super-resolving microscopy reveals the localizations and**  
4 **movement dynamics of stressosome proteins in**  
5 ***Listeria monocytogenes***

6 **Buu Minh Tran<sup>1</sup>, Dmitrii Sergeevich Linnik<sup>1</sup>, Christiaan Michiel Punter<sup>1</sup>, Wojciech**  
7 **Mikołaj Śmigiel<sup>1</sup>, Luca Mantovanelli<sup>1</sup>, Aditya Iyer<sup>1</sup>, Conor O’Byrne<sup>2</sup>, Tjakko Abee<sup>3</sup>,**  
8 **Jörgen Johansson<sup>4</sup> and Bert Poolman<sup>1</sup>**

9 <sup>1</sup> *Department of Biochemistry, University of Groningen, Groningen, the Netherlands*

10 <sup>2</sup> *Microbiology, School of Biological & Chemical Sciences, National University of Ireland*  
11 *Galway, Galway, Ireland*

12 <sup>3</sup> *Laboratory of Food Microbiology, Wageningen University & Research, Wageningen, the*  
13 *Netherlands*

14 <sup>4</sup> *Department of Molecular Biology, Umeå University, Umeå, Sweden*

15 **Keywords:** *Listeria monocytogenes*, protein localization, protein diffusion, Prli42, RsbR1,  
16 RsbL, stressosome, super-resolution microscopy, single-particle tracking, single-molecule  
17 displacement mapping

18

19 **Table 1. Molecular weight ( $M_w$ ), pI, and net charge of proteins of interest**

| Protein/Fusion | Theoretical $M_w$ (kDa) | Average_pI | Average net charge at pH 7.5 |
|----------------|-------------------------|------------|------------------------------|
| mEos3.2        | 26.2                    | 7.33       | -0.49                        |
| mEos3.2-prli42 | 30.1                    | 8.14       | 1.49                         |
| mEos3.2-RsbR1  | 57.8                    | 5.50       | -14.53                       |
| mEos3.2-RsbL   | 55.2                    | 5.29       | -21.46                       |
| RsbR1          | 31.6                    | 4.70       | -14.28                       |
| RsbL           | 28.8                    | 4.60       | -20.21                       |

20 **Protein sequences**

21 >RsbR1 (genome) || Molecular weight: 31620.5 Da

22 MYKDFANFIRTNKADLLNDWMNEMEKQSDQLINDIAKEAMYEETSKEFVDLIVSNVTENG  
 23 KFNEKLDDFAEKVVHLGWPIHFVTTGLRVFGLLVYTAMRDEDLFLKREEKPEDDAYRFET  
 24 WLSSMYNKVVTAAYADTWEKTVSIQKSALQELSAPLLPIFEKISVMPLIGTIDTERAKLIENLLI  
 25 GVVKNRSEVVLIDITGVPVVDTMVAHHIIQASEAVRLVGCQAMLVGIRPEIAQTIVNLGIELD  
 26 QIITNTMKKGMERALALTNREIVEKEG

27 >RsbL (genome) || Molecular weight: 28816.77 Da

28 MTAYPQFDVILKALNLSSVGVIIITDPEQKDNPIIFVNTGFENITGYAKEEALGSNCHFLQGDDT  
 29 DKEEVAKIRHAINNEKSTANVLLKNYRKDGTSMNELTIEPIYDDHEHL YFVGIQKDVTTTEHD  
 30 YQLELEKSLTEIEKLTSTPIVPIKENICVLPLIGSLTHDRFQHMSEYVSEYMDHGKEDYLIMDLS  
 31 GLAEFNEDAVMNLVKFHGFMKLTGVELIITGISPKFAMTLIRYEENLASLTTYSTIKEALQFY

32 >mEos3.2 (in pNF mEos3.2) || Molecular weight: 26217.64 Da

33 MGSAIKPDMKIKLRMEGNVNGHHFVIDGDGTGKPFEGKQSM DLEVKEGGPLPFAFDILTTF  
 34 HYGNRVFAKYPDNIQDYFKQSFPGYSWERSLTFEDGGICNARN DITMEGDTFYNKVRFY  
 35 TNFPANGPVMQKKTLKWPSTEKMYVRDGVLTGDIEMALLLEGNAHYRCDFRTTYKAKEK  
 36 GVKLPGAHFVDHCIEILSHDKDYNKVKLYEHAVAHSGLPDNARRGGTGGGS

37 >mEos3.2-Prli42 (in pNF mEos3.2-prli42) || Molecular weight: 30098.58 Da

38 MGSAIKPDMKIKLRMEGNVNGHHFVIDGDGTGKPFEGKQSM DLEVKEGGPLPFAFDILTTF  
 39 HYGNRVFAKYPDNIQDYFKQSFPGYSWERSLTFEDGGICNARN DITMEGDTFYNKVRFY  
 40 TNFPANGPVMQKKTLKWPSTEKMYVRDGVLTGDIEMALLLEGNAHYRCDFRTTYKAKEK  
 41 GVKLPGAHFVDHCIEILSHDKDYNKVKLYEHAVAHSGLPDNARRGGTGGSPWMTNKKVVR  
 42 VVILMLIAIVLSSVLTGVLMFLVD

43 >mEos3.2-RsbR1 (in pNF mEos3.2-RsbR1) || Molecular weight: 57833.06 Da

44 MGSAIKPDMKIKLRMEGNVNGHHFVIDGDGTGKPFEGKQSMDEVKEGGPLPFAFDILTTAF  
45 HYGNRVFAKYPDNIQDYFKQSFPGYSWERSLTFEDGGICNARNNDITMEGDTFYNKVRFYG  
46 TNFPANGPVMQKKTLKWPSTEKMYVRDGVLTGDIEMALLLEGNAHYRCDFRTTYKAKEK  
47 GVKLPGAHFVDHCIEILSHDKDYNKVKLYEHAVAHSGLPDNARRGGTGGSGSYKDFANFIR  
48 TNKADLLNDWMNEMEKQSDQLINDIAKEAMYETSKEFVDLIVSNVTENGSKFNEKLDDFA  
49 EKVVHLGWPIHFVTTGLRVFGLLVYTAMRDEDLFLKREEKPEDDAYRFETWLSSMYNKV  
50 VTAYADTWEKTVSIQKSALQELSAPLLPIFEKISVMPLIGTIDTERAKLIENLLIGVVKNRSEV  
51 VLIDITGVPVVDTMVAHHIIQASEAVRLVGCQAMLVGIRPEIAQTIVNLGIELDQIITNTMCK  
52 GMERALALTNREIVEKEG

53 >mEos3.2-RsbL (in pNF mEos3.2-RsbL) || Molecular weight: 55161.5 Da

54 MGSAIKPDMKIKLRMEGNVNGHHFVIDGDGTGKPFEGKQSMDEVKEGGPLPFAFDILTTAF  
55 HYGNRVFAKYPDNIQDYFKQSFPGYSWERSLTFEDGGICNARNNDITMEGDTFYNKVRFYG  
56 TNFPANGPVMQKKTLKWPSTEKMYVRDGVLTGDIEMALLLEGNAHYRCDFRTTYKAKEK  
57 GVKLPGAHFVDHCIEILSHDKDYNKVKLYEHAVAHSGLPDNARRGGTGGSEFTAYPQFDVI  
58 LKALNLSSVGVITDPEQKDNPIIFVNTGFENITGYAKEEALGSNCHFLQGDDTDKEEVAKIRH  
59 AINEKSTANVLLKNYRKDGTSMNELTIEPIYDDHEHLYFVGIQKDVTTTEHDYQLELEKSLTE  
60 IEKLSTPIVPIKENICVLPLIGSLTHDRFQHMSEYVSEYMDHGKEDYLIMDLGLAEFNEDAV  
61 MNLVKFHGFMKLTGVELIITGISPKFAMTLIRYEENLASLTTYSTIKEALQFY

62

63 RsbR1: Blue sequence/ RsbL: Dark golden sequence/ mEos3.2: Green sequence/ Prli42: Magenta  
64 sequence/ GGTGGS: hexa-amino acid linker

65

66

67 **Table 2. List of strains and plasmids used in this paper**

| Bacteria strains                                             | Reference/source               |
|--------------------------------------------------------------|--------------------------------|
| <i>Escherichia coli</i>                                      |                                |
| K12                                                          | NovaBlue                       |
| MC1061 <i>AarcB</i> (Erythromycin sensitive)                 | 1                              |
| <i>Listeria monocytogenes</i>                                | 2                              |
| EGD-e                                                        | K. Boor (Connor O'Byrne's lab) |
| EGD-e <i>ArsbR1</i>                                          | 2                              |
| EGD-e <i>mEos3.2::rsbR1</i>                                  | This study                     |
| EGD-e <i>ArsbL</i>                                           | 3                              |
| EGD-e <i>mEos3.2::rsbL</i>                                   | This study                     |
| EGD-e <i>AsgB</i>                                            | 4                              |
| EGD-e <i>Aprli42</i>                                         | 5                              |
|                                                              |                                |
| Plasmid                                                      |                                |
| pMAD                                                         | 6                              |
| pMAD <i>mEos3.2-RsbR1</i>                                    | This study                     |
| pMAD <i>mEos3.2-RsbL</i>                                     | This study                     |
| pNF GFP-RsbR1                                                | This study                     |
| pNF <i>mEos3.2</i>                                           | This study                     |
| pNF <i>mEos3.2-Prli42</i>                                    | This study                     |
| pNF <i>mEos3.2-RsbR1</i> (including in-frame RsbS and RsbT)) | This study                     |
| pNF <i>mEos3.2-RsbL</i>                                      | This study                     |
| pNF <i>RsbL</i>                                              | This study                     |

68



69 **Table 3. List of primers**

| No. | Name                  | Function                                                                                                                                                                                                                                | Sequence (5' □ 3')                                    | Reference  |
|-----|-----------------------|-----------------------------------------------------------------------------------------------------------------------------------------------------------------------------------------------------------------------------------------|-------------------------------------------------------|------------|
| 1.  | Fw Up_RsbL            | Forward primer (carries NcoI site) and reverse primer (carries Sall site) to amplify the 811 bp sequence upstream of the gene <i>rsbL</i> ( <i>lmo0799</i> )                                                                            | CCACCATGGCAGGATCTGG<br>AAAAAGATC                      | This study |
| 2.  | Rv Up_RsbL            |                                                                                                                                                                                                                                         | GTCGTCGACCTGCGTGTTC<br>TCCCCCT                        | This study |
| 3.  | Fw mEos3.2 (L)        | Forward primer (carries Sall site) and reverse primer (carries EcoRI site) to amplify the gene <i>mEos3.2</i> with a 6-amino acid linker                                                                                                | GTCGTCGACATGGGAAGTG<br>CGATTAAGCC                     | This study |
| 4.  | Rv mEos3.2 (L)        |                                                                                                                                                                                                                                         | GAAGAATTCCGAACCGCCG<br>GTACCGCCTCGTCTGGCATT<br>GTCAGG | This study |
| 5.  | Fw RsbL               | Forward primer (carries EcoRI site) and reverse primer (carries NcoI site) to amplify the gene <i>rsbL</i> ( <i>lmo0799</i> ) and its 811 bp sequence downstream                                                                        | GAAGAATTCACCGCTTATCC<br>ACAATTCGATG                   | This study |
| 6.  | Rv RsbL               |                                                                                                                                                                                                                                         | CCACCATGGTTCTGATTCTC<br>CGTAAGCTTTTACC                | This study |
| 7.  | Fw Up_RsbR1           | Forward primer (carries NcoI site) and reverse primer (carries Sall site) to amplify the 964 bp sequence upstream of the gene <i>rsbR1</i> ( <i>lmo0889</i> )                                                                           | CCACCATGGGCGAAATAAC<br>TCTTTTCTTCAAGGC                | This study |
| 8.  | Rv Up_RsbR1           |                                                                                                                                                                                                                                         | GTCGTCGACCAAGTTATTTTC<br>CAACCTTTCTCCAC               | This study |
| 9.  | Rv mEos3.2 (1)        | Reverse primer (carries BamHI site) to amplify the gene <i>mEos3.2</i> with 6-amino acid linker; used with the forward primer of Fw mEos3.2 (L)                                                                                         | GGAGGATCCCGAACCGCCG<br>GTACCGCCTCGTCTGGCATT<br>GTCAGG | This study |
| 10. | Fw RsbR1              | Forward primer (carries BamHI site) and reverse primer (carries NcoI site) to amplify the gene <i>rsbR1</i> ( <i>lmo0889</i> ) and 1160 bp sequence downstream, including the genes <i>rsbS</i> , <i>rsbT</i> , and part of <i>rsbU</i> | GGAGGATCCTATAAAGATTT<br>TGCAAACCTCATCCG               | This study |
| 11. | Rv RsbR1_short        |                                                                                                                                                                                                                                         | CCACCATGGGCCAAAATCA<br>AGTTCATCGTG                    | This study |
| 12. | Fw upup_RsbL          | Forward primer at 1126 bp upstream of the gene <i>rsbL</i> ( <i>lmo0799</i> ) to confirm the chromosomal integration                                                                                                                    | GGTTATTTCCGCAATAGAAA<br>GTAG                          | This study |
| 13. | Rv mid_mEos3.2        | Reverse primer in the middle of the gene <i>mEos3.2</i> to confirm chromosomal integration                                                                                                                                              | CCTTCCATTGTTATGTGCTTT<br>C                            | This study |
| 14. | Fw mid_mEos3.2        | Forward primer in the middle of the gene <i>mEos3.2</i> to confirm the chromosomal integration                                                                                                                                          | GGACACTTTCTATAATAAAG<br>TTCGATT                       | This study |
| 15. | Rv downdown_RsbL      | Reverse primer at 1081 bp downstream of gene <i>rsbL</i> ( <i>lmo0799</i> ) to confirm the chromosomal integration                                                                                                                      | CCAGAACACTTGTTTAATCG<br>C                             | This study |
| 16. | Fw upup_RsbR1         | Forward primer at 1015 bp upstream of the gene <i>rsbR1</i> ( <i>lmo0889</i> ) to confirm the chromosomal integration                                                                                                                   | GGACTTAAGGGAGTATATC<br>AGCT                           | This study |
| 17. | Rv downdown_RsbR1     | Reverse primer at 2029 bp downstream of the gene <i>rsbR1</i> ( <i>lmo0889</i> ) to confirm the chromosomal integration                                                                                                                 | GCTGTATAAGCATCGATCTC<br>C                             | This study |
| 18. | Rv mEosRST            | Reverse primer to clone RsbRST from pMAD mEos3.2-RsbR1; carries NcoI site                                                                                                                                                               | GCCGCCATGGTTACCGAACC<br>CATTTTCG                      | This study |
| 19. | Fw pNF                | Forward primer to clone the pNF8 backbone creating pNF mEos3.2-RsbRST; carries NcoI site                                                                                                                                                | CCACCATGGCTGCAGGCATG<br>CAAGC                         | This study |
| 20. | Rv pNF                | Reverse primer to clone pNF8 backbone creating pNF mEos3.2-RsbRST; carries Sall site                                                                                                                                                    | GTCGTCGACTTAATAAACCT<br>CCTTTCGGATCCGTTG              | This study |
| 21. | Rv mEosRsbL/RsbL(pNF) | Reverse primer to clone mEos3.2-RsbRL or <i>rsbL</i> from pMAD mEos3.2-RsbL; carries NcoI site                                                                                                                                          | CCACCATGGTTAGTAAAATT<br>GTAATGCTTCTTTGATTGTG<br>C     | This study |
| 22. | Fw RsbRL(pNF)         | Forward primer to clone <i>rsbL</i> ( <i>lmo0799</i> ) from pMAD mEos3.2-RsbL; carries Sall site                                                                                                                                        | GTCGTCGACATGACCGCTTA<br>TCCACAATTCG                   | This study |
| 23. | Fw mEos3.2 pNF8       | Forward primer to clone gene for mEos3.2 from pMAD mEos3.2-RsbR1                                                                                                                                                                        | AGGTTTATTAAUGGGAAG<br>TGCGATTAAGC                     | This study |
| 24. | Rv mEos3.2 pNF8       | Reverse primer to clone gene for mEos3.2 from pMAD mEos3.2-RsbR1                                                                                                                                                                        | AGTTATTAUGAACCGCCGGT<br>ACCG                          | This study |

|     |                    |                                                                               |                                       |            |
|-----|--------------------|-------------------------------------------------------------------------------|---------------------------------------|------------|
| 25. | Fw pNF8 (prli42)   | Forward primer to open pNF8 backbone                                          | ATAATAACUGCAGGCATGC<br>AAGCTTG        | This study |
| 26. | Rv pNF8 mEos3.2    | Reverse primer to open pNF8 backbone                                          | ATTTAATAAACCUCCTTTCG<br>GATCCGTTG     | This study |
| 27. | Fw-pNF8 sequencing | Forward primer for sequencing to check for proper insertion of mEos3.2        | TGAGCGCAACGCAATTAAT<br>G              | This study |
| 28. | Rv-pNF8 sequencing | Reverse primer for sequencing to check for proper insertion of mEos3.2        | CGATTAAGTTGGGTAACGCC<br>AG            | This study |
| 29. | Fw prli42 (res)    | Forward primer to amplifying <i>prli42</i> from pAD prli42; carries NcoI site | CCACCATGGATGACTAATAA<br>AAAAGTAGTTCGC | This study |
| 30. | Rv prli42 (res)    | Reverse primer to amplifying <i>prli42</i> from pAD prli42; carries Sall site | GTCGTCGACTAAAAACATTA<br>ATACCCCGGTT   | This study |
| 31. | Fw pNFmEos (res)   | Forward primer to amplifying pNF mEos3.2; carries Sall site                   | GTCGTCGACTAATAACTGCA<br>GGCATGCAAGC   | This study |
| 32. | Rv pNFmEos (res)   | Reverse primer to amplifying pNF mEos3.2; carries NcoI site                   | CCACCATGGTGAACCGCCG<br>GTACCG         | This study |

70

71

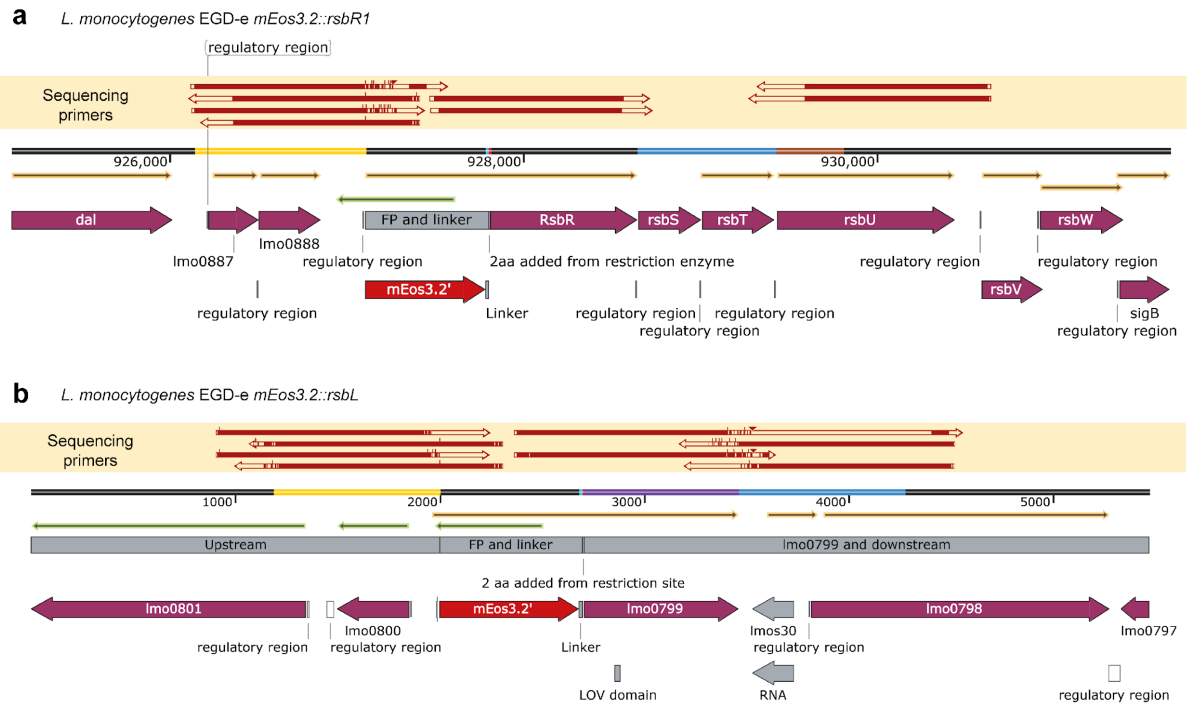

72

73 **Supplementary Fig. 1 | Sequencing results of the integration strains. a,** and **b,** *L.*  
 74 *monocytogenes* EGD-e *mEos3.2::rsbR1* and *L. monocytogenes* EGD-e *mEos3.2::rsbL*,  
 75 respectively. Two colonies of each integrant were sequenced. After chromosomal  
 76 integration of *mEos3.2::rsbR1* and *mEos3.2::rsbL*, the plasmids were excised as shown by X-  
 77 gal (blue-white) and antibiotic sensitivity screens. Selected colonies were checked for  
 78 integration by colony-PCR and sequencing with primers upstream, downstream, and two  
 79 middle positions of the gene *mEos3.2*.

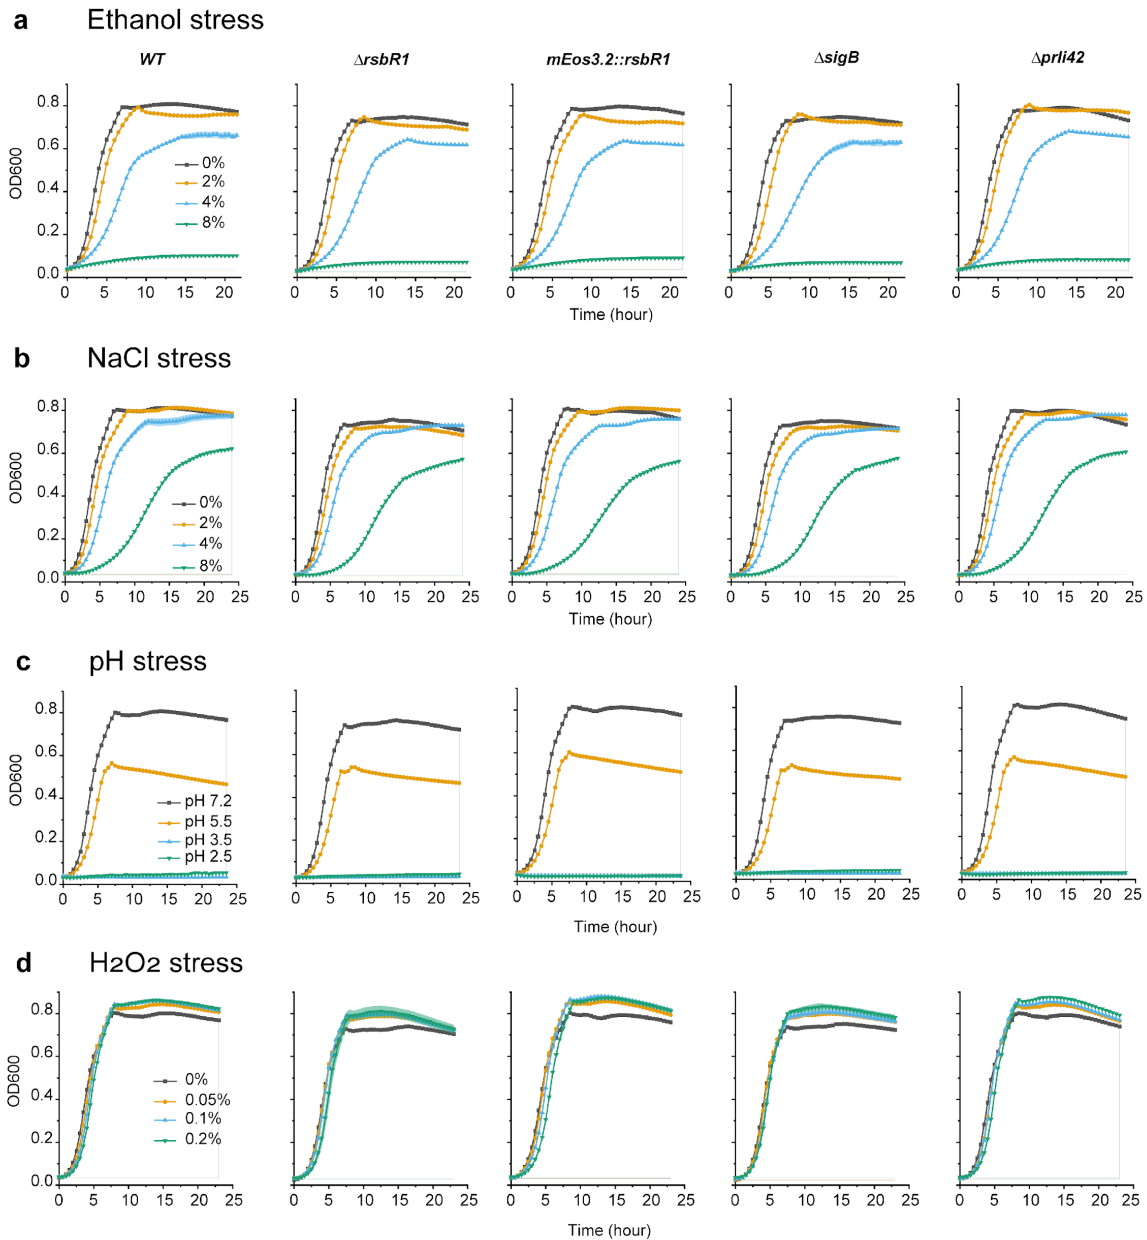

80

81 **Supplementary Fig. 2 | Growth under ethanol, NaCl, low pH, and H<sub>2</sub>O<sub>2</sub> stress of**  
 82 ***L. monocytogenes* wild-type,  $\Delta$ *rsbR1*, integrant *mEos3.2::rsbR1*,  $\Delta$ *sigB*, and  $\Delta$ *pri42*.** The  
 83 growth was monitored in 96-well plates at 30 °C with 200 rpm shaking. Cells were grown in  
 84 BHI medium supplemented with **(a)** ethanol at 0% (control), 2%, 4%, and 8% (v.v<sup>-1</sup>); **(b)** NaCl  
 85 at 0% (control), 2%, 4%, and 8% (w.v<sup>-1</sup>); **(c)** HCl to set the pH to pH 7.2 (control), pH 5.5, pH  
 86 3.5, and pH 2.5; and **(d)** with H<sub>2</sub>O<sub>2</sub> at 0% (control), 0.05%, 0.1% and 0.2%.

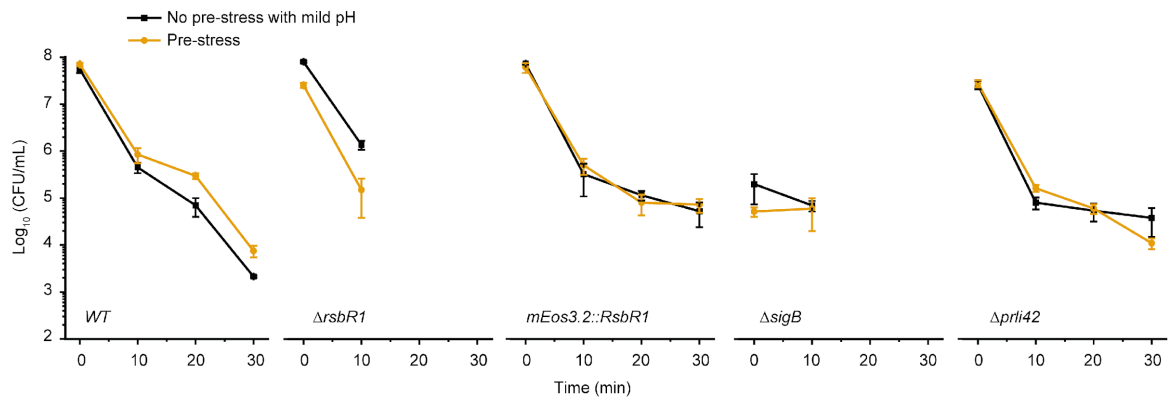

87

88 **Supplementary Fig. 3 | Phenotypic test of survival of *L. monocytogenes* upon acid shock**  
 89 **treatment.** Mid-log phase cultures untreated at pH 7.2 (No pre-stress) or treated at pH 5.0  
 90 (Pre-stress) for 15 min and subsequently challenged in acidified BHI (pH 2.5). The detection  
 91 threshold is  $10^2$  CFU.mL<sup>-1</sup>. Samples were taken at 0, 10, 20, and 30 min. Survival data are  
 92 expressed as Log<sub>10</sub> (CFU.mL<sup>-1</sup>).  $\Delta rsbR1$  and  $\Delta sigB$  were notably more sensitive to the acid  
 93 treatment than wild-type,  $mEos3.2::rsbR1$ , and  $\Delta prli42$  and colonies were no longer  
 94 detected after 10 min treatment at pH 2.5. Error bars represent standard deviations. Three  
 95 biological replicates were made.

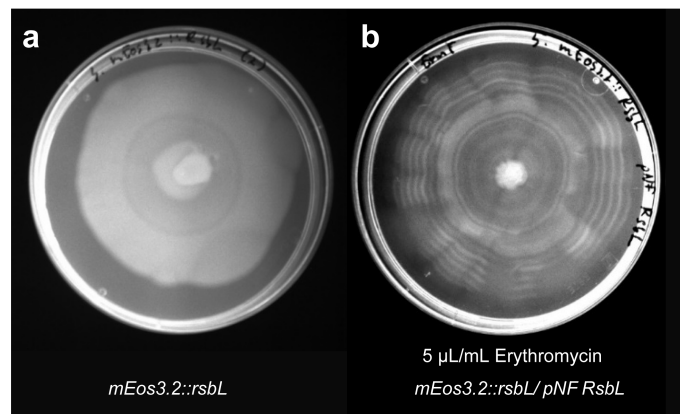

96

97 **Supplementary Fig. 4 | Ring formation phenotype on low-agar after twelve oscillating**  
 98 **cycles of light and dark (12-hour intervals).** a, and b, The integration strain  $mEos3.2::rsbRL$   
 99 and the same strain expressing *rsbL* from the  $P_{dit}$  promoter of pNF RsbL. We used an  
 100 erythromycin concentration for plasmid selection of  $5 \mu\text{g.mL}^{-1}$ . Images are representative of  
 101 at least three independent experiments.

102

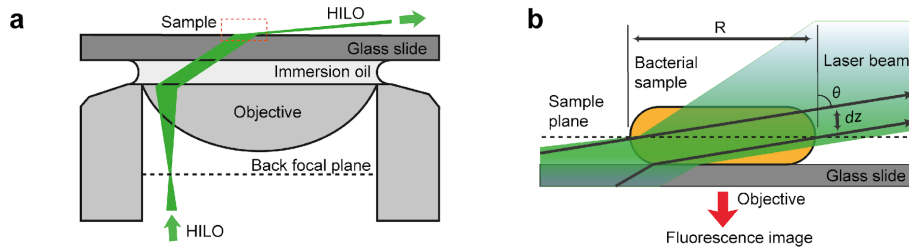

103

104

105

106

107

108

109

**Supplementary Fig. 5 | Schematic of the highly inclined and laminated optical sheet (HILO) microscopy, adapted from the previous study<sup>7</sup>.** **a**, The set-up of optics. **b**, Bacterial sample is illuminated with a laminated thin sheet of the laser beam. The  $dz$  is the thickness of the geometrical optics along the  $z$ -direction and  $dz = R/\tan\theta$ , where  $R$  is the diameter of the illuminated area, and  $\theta$  is the incidence angle at the sample.

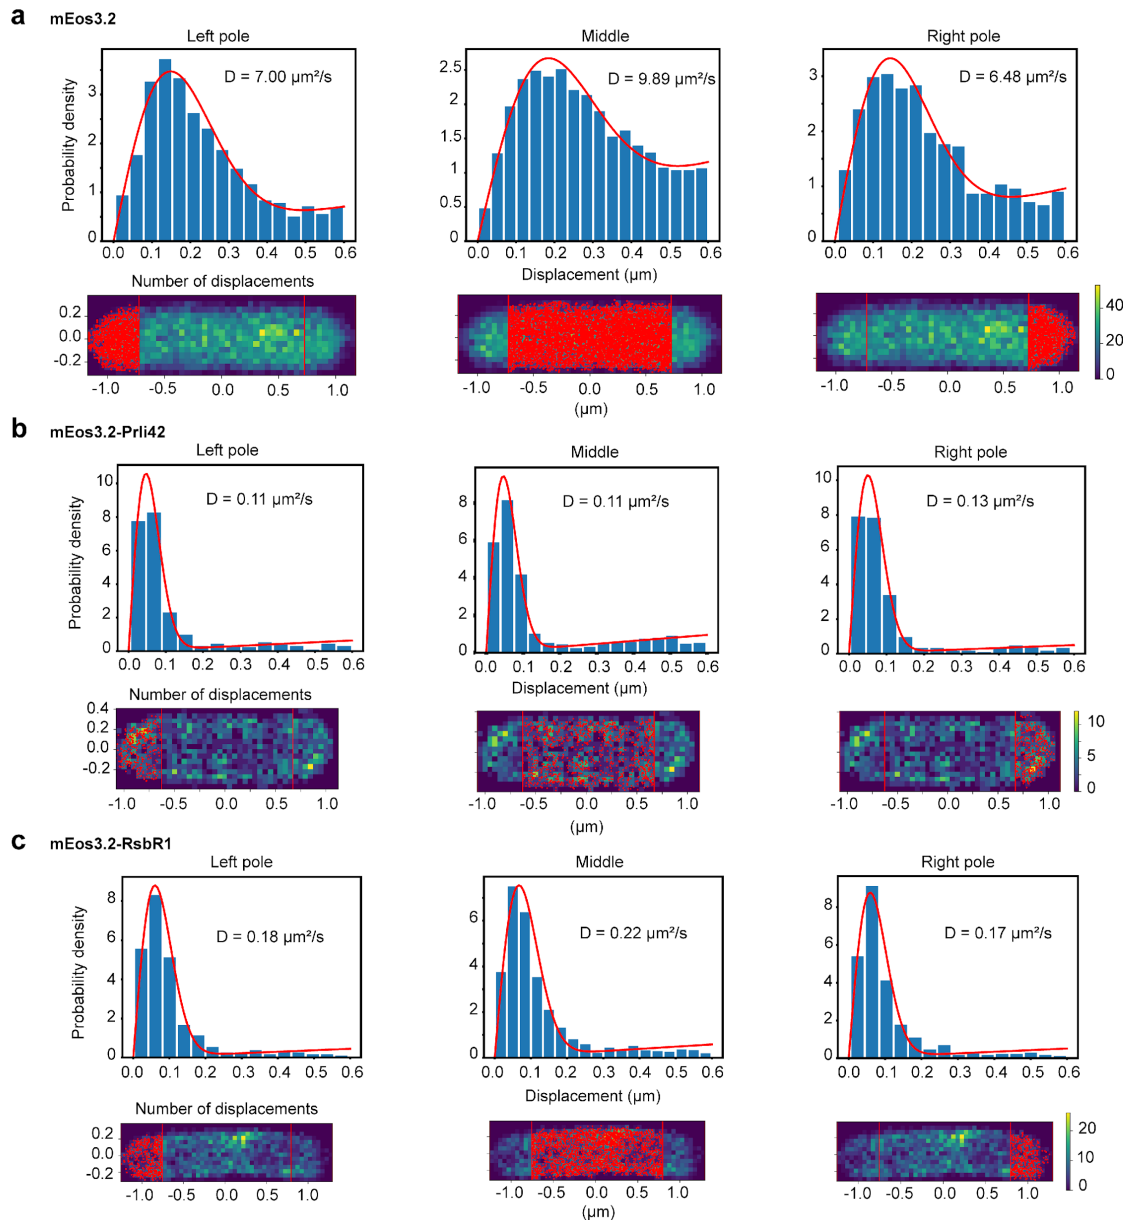

110

111 **Supplementary Fig. 6 | Diffusion at subcellular regions.** **a**, **b**, and **c**, show the subcellular  
 112 division of free mEos3.2, mEos3.2-Prli42, and mEos3.2-RsbR1, respectively. Cells were  
 113 divided into three main regions: the cell center (60% in length) and the cell poles (each  
 114 20% in length). The displacements belonging to the corresponding regions were then  
 115 analyzed separately. The top panels are the distributions of all single-molecule  
 116 displacements from the corresponding regions shown in the bottom panels. The red curve  
 117 is obtained from MLE fitting, using equation (4), and the resulting diffusion coefficients are  
 118 presented inside the panels.

119

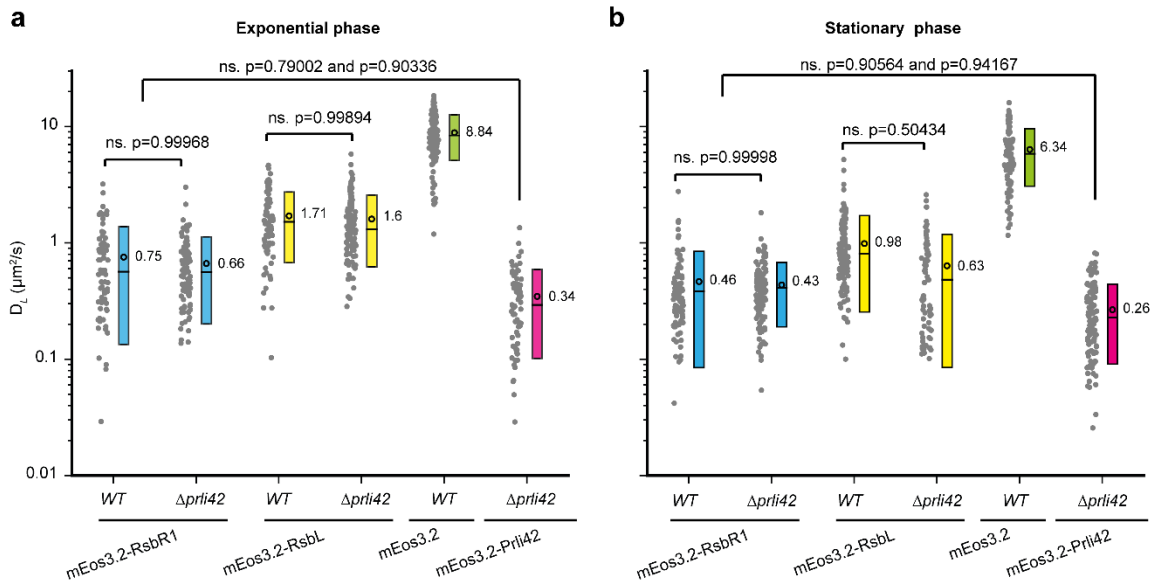

120

121 **Supplementary Fig. 7 | Ensemble diffusion coefficients determined by FRAP**  
 122 **measurements. a, and b,** Box charts of the  $D_L$  from FRAP measurements showing the  
 123 ensemble mobility of mEos3.2-RsbR1, mEos3.2-RsbL, mEos3.2-Prli42, and mEos3.2 in the  
 124 wild-type and  $\Delta prli42$  strains in the exponential and stationary phase of growth. Each dot  
 125 shows the data of one cell. The box range indicates the standard deviation (SD), and the  
 126 open circle and dashed symbols inside the boxes indicate the mean and median,  
 127 respectively. (ns) is not significant and statistical significance was determined by one-way  
 128 ANOVA followed by Tukey's post-hoc test to calculate P-values.

129



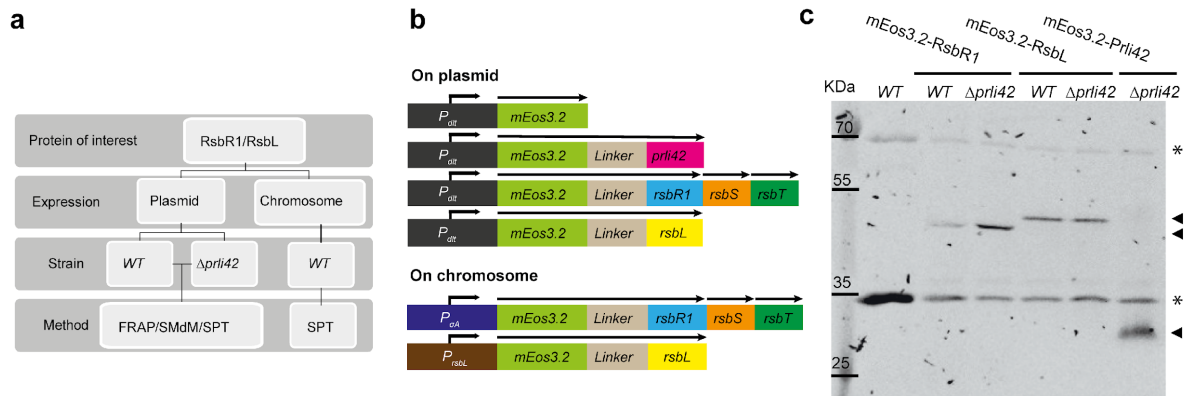

130

131 **Supplementary Fig. 8 | Experimental overview, protein tagging strategy, electrophoretic**

132 **mobility, and in-gel fluorescence of proteins. a**, Experimental overview for measuring the

133 intracellular dynamics of stressosome proteins in live cells. The targeted proteins are

134 RsbR1, and RsbL produced either from a multi-copy plasmid or the chromosome in wild-

135 type (WT) or  $\Delta pri42$  strains. The diffusion coefficients of the proteins are measured by

136 FRAP, SMdM, or SPT. **b**, A photoconvertible fluorescent protein mEos3.2 is fused to the N-

137 terminus of mEos3.2-RsbR1 and mEos3.2-RsbL, and the fusion proteins are produced from

138 a plasmid or the chromosome. Free cytosolic mEos3.2 and mEos3.2 fused to the N-

139 terminus of Pri42 (mEos3.2-Pri42) are produced from pNF mEos3.2-Pri42, which is under

140 the control of the constitutive  $P_{dit}$  promoter; while the chromosomal expression is driven

141 by corresponding native promoters, which are  $P_{sigA}$  and  $P_{rsbL}$  for *rsbR1* and *rsbL*,

142 respectively. **c**, In-gel fluorescence of the constructs tagged with mEos3.2 produced in the

143 wild-type and  $\Delta pri42$  strains. The expected bands are shown by black triangle symbols. A

144 star symbol represents endogenous fluorescence in *L. monocytogenes*. The molecular

145 weight (kDa) of the marker proteins is indicated on the left of the panel. These results

146 indicate that the tandem fusions inside *L. monocytogenes* are intact.

147

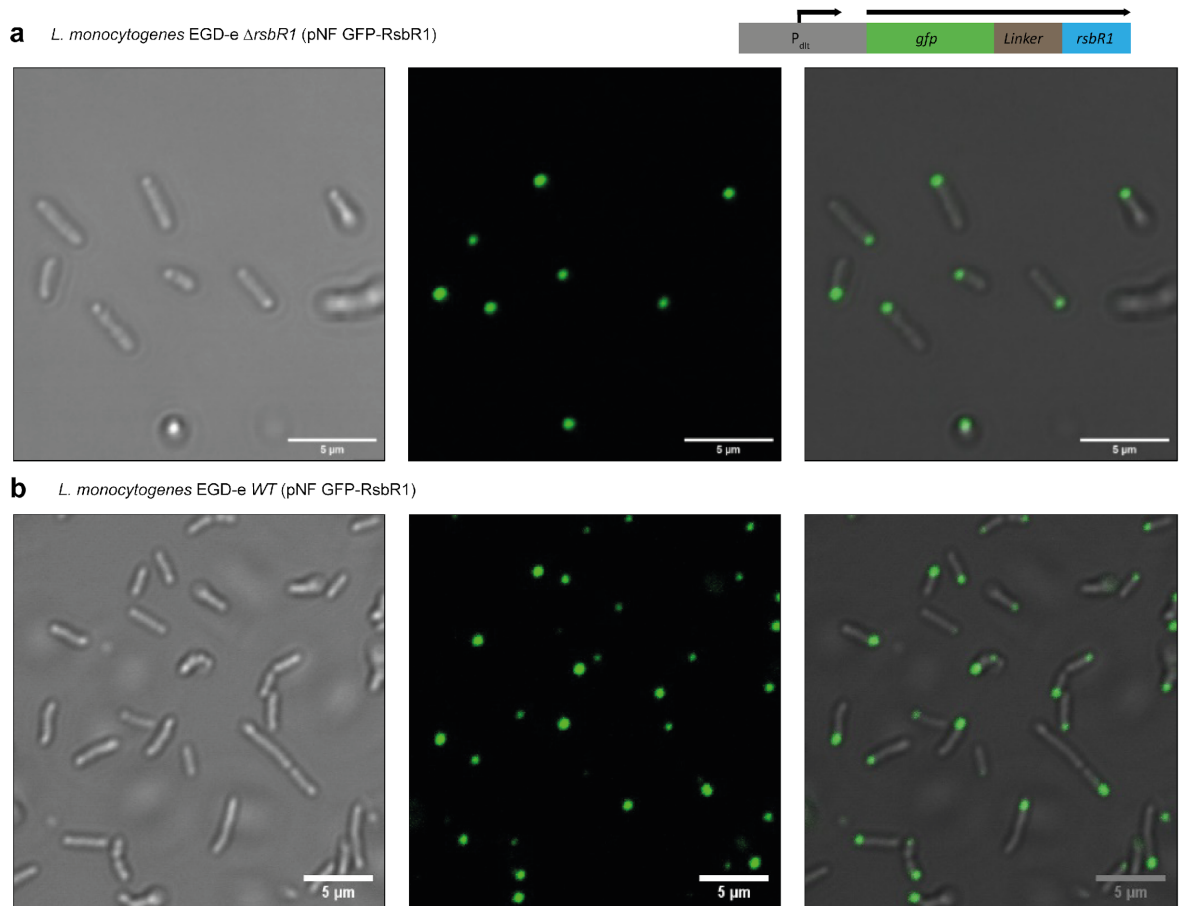

148

149 **Supplementary Fig. 9 | Pole aggregation of GFP-RsbR1 observed by confocal microscopy.**

150 The green fluorescent protein GFP was fused to the N-terminal end of RsbR1 on pNF GFP-  
 151 RsbR1 under the control of the  $P_{dlt}$  promoter. **a**, and **b**, The expression of *gfp-rsbR1* in  
 152  $\Delta$ *rsbR1* and wild-type strains is shown, respectively. Left panels are the bright field; middle  
 153 panels are the fluorescence upon 488 nm excitation; right panels are the overlays of the left  
 154 and middle panels. Scale bars are 5  $\mu$ m.

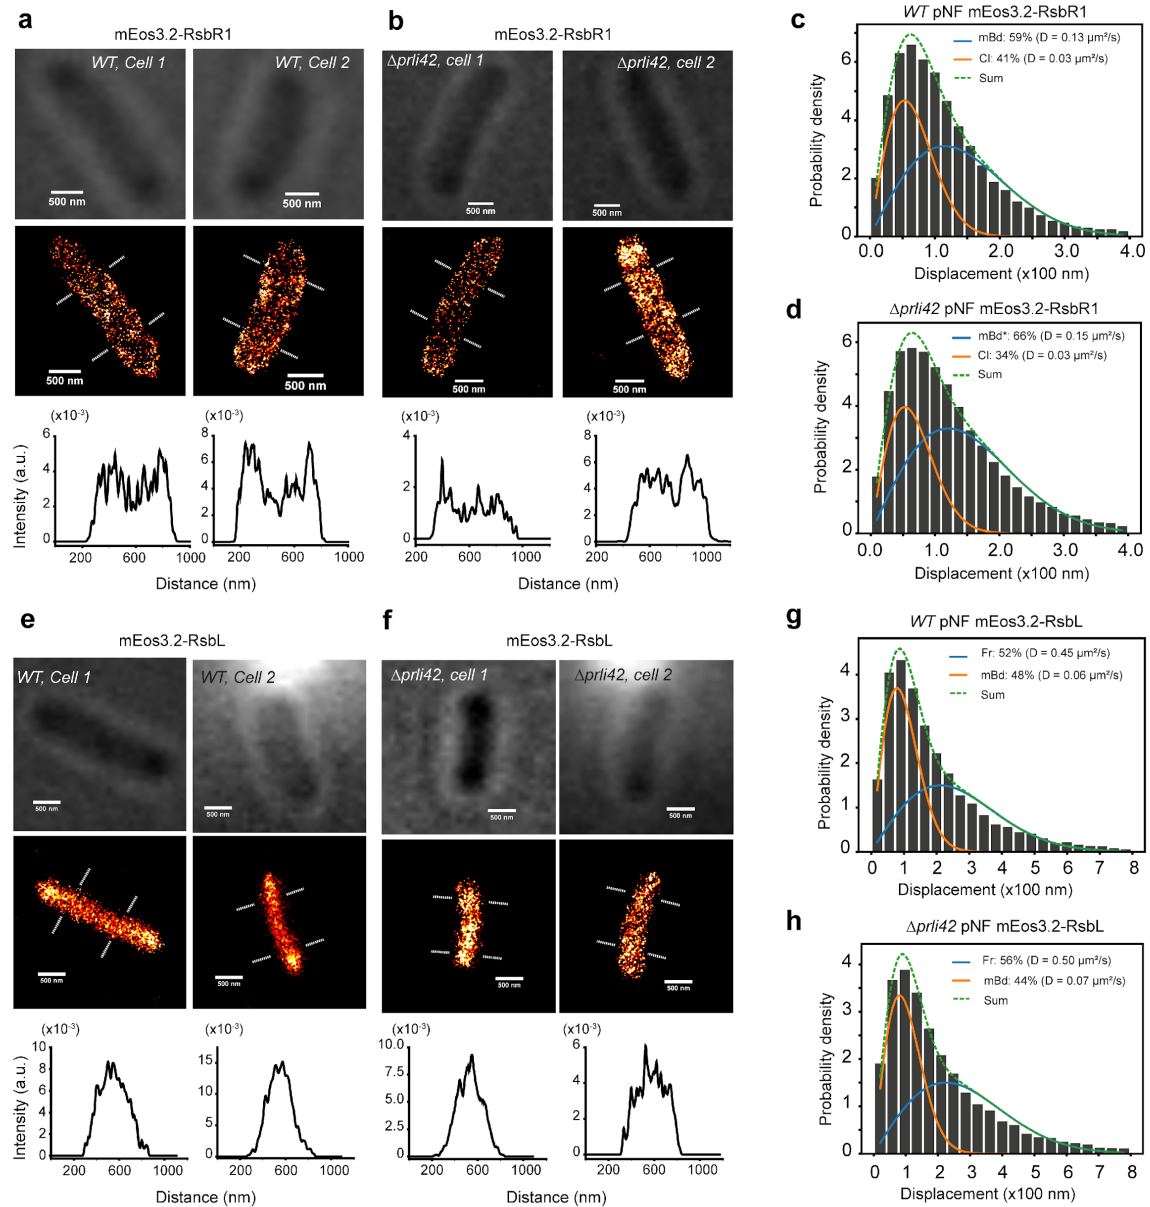

155

156 **Supplementary Fig. 10 | Localization by PALM and lateral diffusion by SPT of mEos3.2-**  
 157 **RsbR1 and mEos3.2-RsbL.** **a**, and **b**, Localization of mEos3.2-RsbR1 in wild-type and  $\Delta pri42$   
 158 strains, respectively. The top panels are bright-field images. Middle panels are  
 159 reconstructed images from a series of frames. All fusion proteins were expressed from the  
 160  $P_{dit}$  promoter of pNF mEos3.2-RsbR1, and pNF mEos3.2-RsbL Scale bars are 500 nm. **c**, and  
 161 **d**, Distributions of single-molecule displacements of mEos3.2-RsbR1 in wild-type and  $\Delta pri42$   
 162 strains, respectively. Blue and orange curves, showing membrane-bound (mBd) and (CI)  
 163 fractions, were obtained from fitting the histogram to the two-component 2D random walk  
 164 model using equation (6). The starred membrane-bound fraction (mBd\*) indicates mEos3.2-  
 165 RsbR1 molecules loosely associated with the membrane in the  $\Delta pri42$  strain. The green

166 dashed line is the sum of two fractions. **e**, and **f**, Localization of mEos3.2-RsbL in wild-type  
 167 and  $\Delta prli42$  strains, respectively. Similar to **(c)** and **(d)**, **g**, and **h**, are distributions of single-  
 168 molecule displacements of mEos3.2-RsbL. Differences in maximum displacement distances  
 169 ( $r_{\max}$ ) were chosen based on the diffusion constants of the proteins.

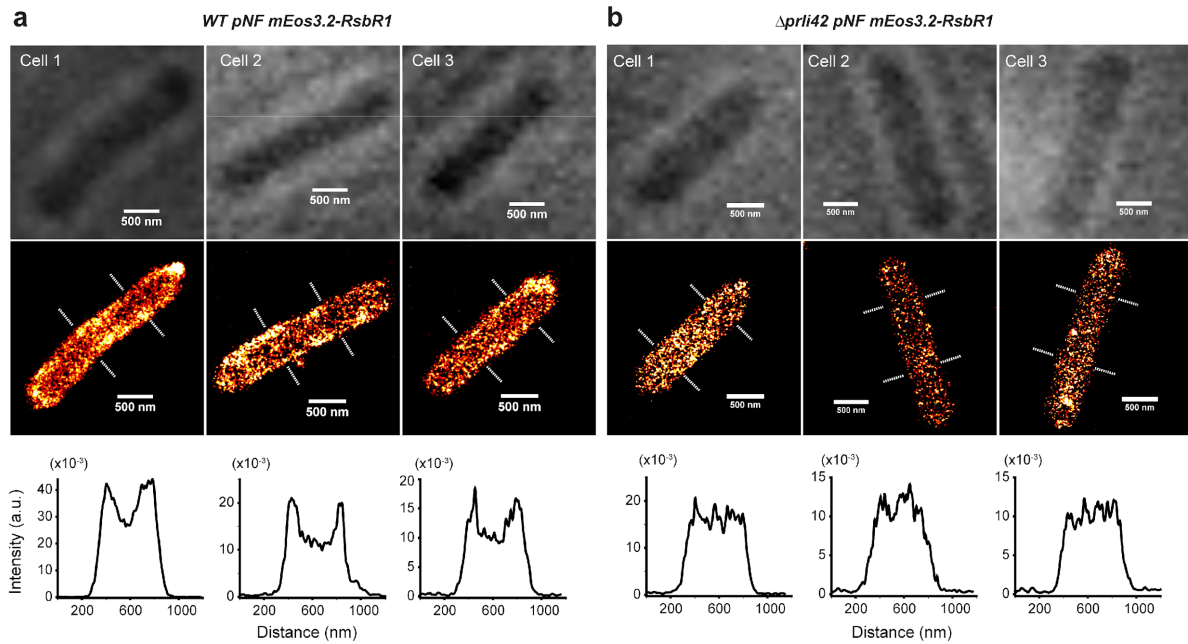

170

171 **Supplementary Fig. 11 | Reconstruction images of mEos3.2-RsbR1.** The tandem fusion was  
 172 synthesized in cells from the  $P_{dlt}$  promoter of pNF mEos3.2-RsbR1 and performing SMdM  
 173 measurements (65,000 frames). Single-molecule detection was done using equation (5). **a**,  
 174 Membrane localizations are detected in the wild-type strain. **b**, Most localized molecules  
 175 are found in the cytoplasm in the  $\Delta prli42$  strain.

176

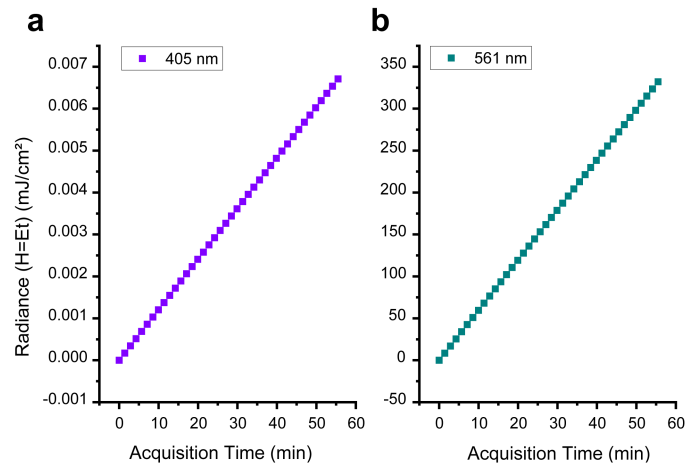

177

178 **Supplementary Fig. 12 | Radiance graph ( $H = E \cdot t$ ).** H is the radiant exposure dose in  $\text{mJ} \cdot \text{cm}^{-2}$   
 179  $^2$ , E is the irradiance in  $\text{mW} \cdot \text{cm}^{-2}$ , and t is the exposure time in seconds. The acquisition  
 180 frequency is 56 Hz; the pulse time of **(a)** 405 nm and **(b)** 561 nm are 1 ms and 0.5 ms,  
 181 respectively; 405 nm pulses in every 2 frames, and 561 nm pulses in every frame; hence, in  
 182 1 second, the radiance time of 405 nm and 561 ms are 28 ms.

183

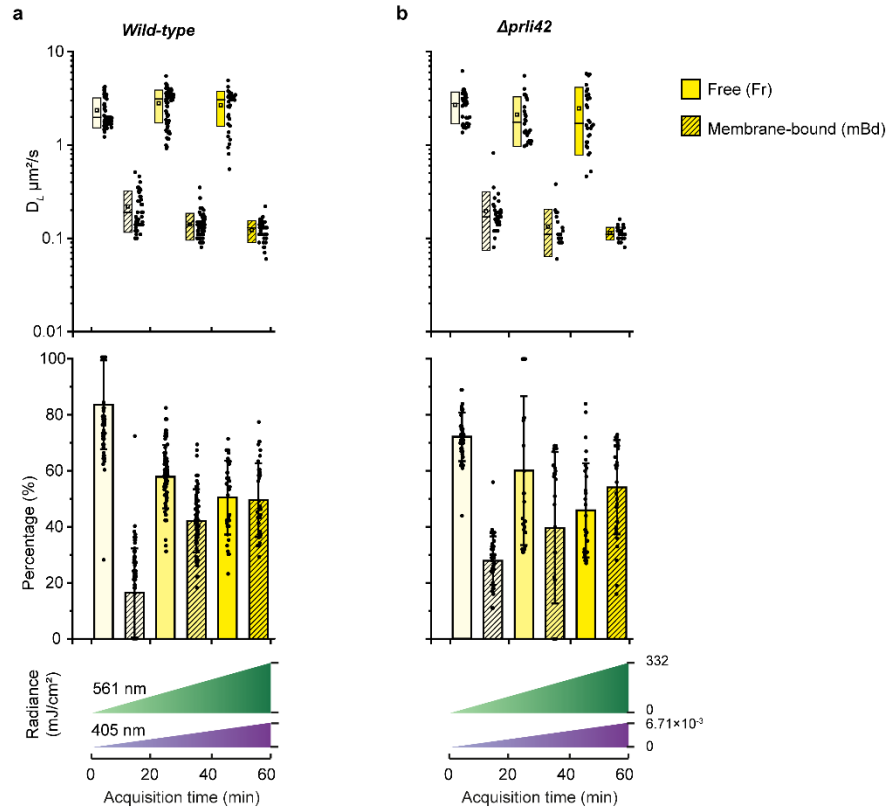

184

185 **Supplementary Fig. 13 | RsBL clustering upon laser light irradiation is not Prli42-**  
 186 **dependent. a, and b,** Lateral diffusion of mEos3.2-RsBL in 3 continuous SMdM acquisitions  
 187 (each of ~20 min) in wild-type and  $\Delta pri42$  strains, respectively. Top panel: box charts of the  
 188  $D_L$  with the free (Fr) fraction and membrane-bound (mBd) fractions. Each dot shows the  
 189 data of one cell. Box range indicates the standard deviation (SD), and open square and dash  
 190 symbols inside the boxes indicate the mean and median, respectively. Middle panel: the  
 191 corresponding percentage of the fractions is in the top panel. Error bars represent standard  
 192 deviations. Bottom panel: the radiance of 561 nm and 405 nm lasers were measured at the  
 193 focus above the glass slide during the acquisition.

194

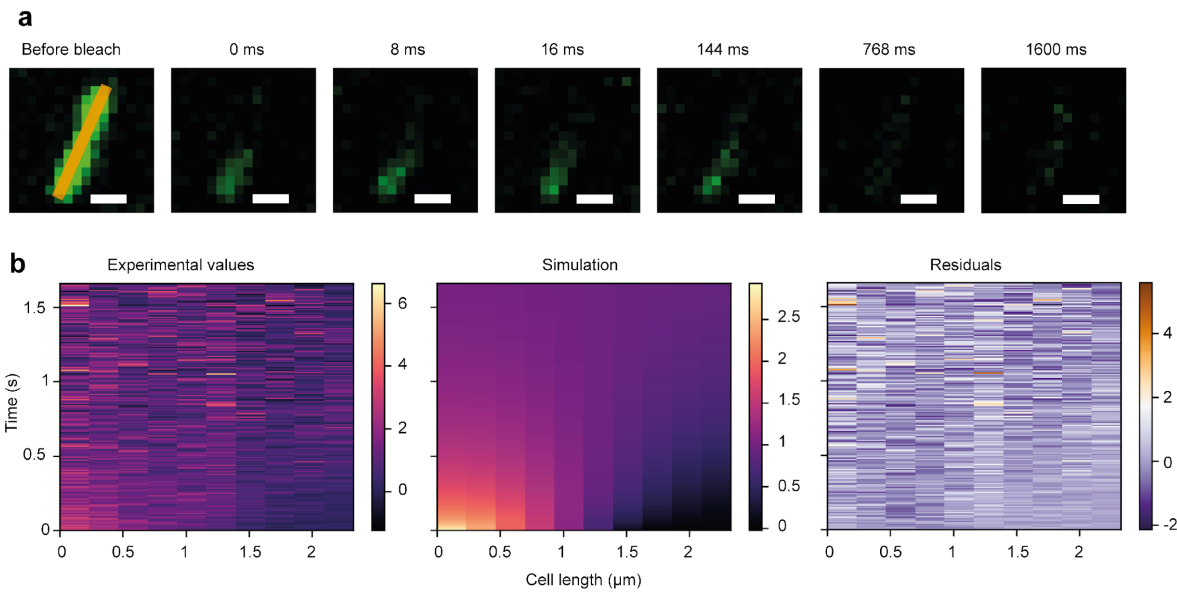

195  
 196 **Supplementary Fig. 14 | FRAP acquisition to determine ensemble diffusion coefficients. a,**  
 197 An example of a FRAP acquisition and the fluorescence recovery for the diffusion constant  
 198 of  $1.03 \pm 0.06 \mu\text{m}^2 \cdot \text{s}^{-1}$ . The orange line marks the analyzed region; each acquisition has 200  
 199 cycles, and the average intensity before bleaching (the first 3 cycles) is used to normalize  
 200 the fluorescence. Time zero was recorded immediately after the photobleaching. The scale  
 201 bar is  $1 \mu\text{m}$ . **b,** The fluorescent intensity along the orange line of the labelled cell of the  
 202 panel **(a)** in time for the experimental data (left), the one-dimensional heat-equation  
 203 simulation (middle), and the residuals (right).

204

205 **References**

- 206 1. Ho, F. Y. & Poolman, B. *Engineering escherichia coli for functional expression of*  
207 *membrane proteins. Methods in Enzymology* **556**, (Elsevier Inc., 2015).
- 208 2. O’Donoghue, B. A molecular genetic investigation into stress sensing in the food-  
209 borne pathogen *Listeria Monocytogenes*: roles for RsbR and its paralogues. (2016).
- 210 3. O’Donoghue, B. *et al.* Blue-light inhibition of *Listeria monocytogenes* growth is  
211 mediated by reactive oxygen species and is Influenced by  $\sigma$ B and the blue-light sensor  
212 Lmo0799. *Appl. Environ. Microbiol.* **82**, 4017–4027 (2016).
- 213 4. Guerreiro, D. N. *et al.* Mild Stress Conditions during Laboratory Culture Promote the  
214 Proliferation of Mutations That Negatively Affect Sigma B Activity in *Listeria*  
215 *monocytogenes*. *J. Bacteriol.* **202**, 1–20 (2020).
- 216 5. Impens, F. *et al.* N-terminomics identifies Prli42 as a membrane miniprotein conserved  
217 in Firmicutes and critical for stressosome activation in *Listeria monocytogenes*. *Nat.*  
218 *Microbiol.* **2**, (2017).
- 219 6. Arnaud, M., Chastanet, A. & De, M. New vector for efficient allelic replacement in  
220 naturally nontransformable, low-GC-content, Gram-positive bacteria. *Appl.*  
221 *Enviromental Microbiol.* **70**, 6887–6891 (2004).
- 222 7. Tokunaga, M., Imamoto, N. & Sakata-Sogawa, K. Highly inclined thin illumination  
223 enables clear single-molecule imaging in cells. *Nat. Methods* **5**, 159–161 (2008).
- 224
