# Supplementary material for: Super-resolving microscopy reveals the localizations and movement dynamics of stressosome proteins in Listeria monocytogenes
Source: PubMed Central journal article supplement (PMC9840623; doi:10.1038/s42003-023-04423-y), 2023-01-14
Supplement: 42003_2023_4423_MOESM3_ESM.pdf [file 42003_2023_4423_MOESM3_ESM.pdf]

## Description of Additional Supplementary Files

**File name:** Supplementary Video 1

**Description:** Localization of mEos3.2-RsbR1 in *L. monocytogenes*

**File name:** Supplementary Video 2

**Description:** Clustering of mEos3.2-RsbR1 in *L. monocytogenes* (overlaid with a phase contrast image)

**File name:** Supplementary Video 3

**Description:** Clustering upon irradiation of mEos3.2-RsbL in *L. monocytogenes*

**File name:** Supplementary Data 1

**Description:** Excel file with all diffusion coefficients reported in the paper
